# Supplementary material
Source: Research Square preprint supplement (doi:10.21203/rs.3.rs-9670576/v1)
Supplement: Supplementary file 1 [file 6a28737dea8b8144c2e12012.docx]

**Metal–hydrogen interactions in Li- and Sc-functionalized [3,3]paracyclophane: a density functional theory study of bonding and adsorption mechanisms**

**Ridha Ben Said1, Youghourta Belhocine2, Seyfeddine Rahali1,***

1 Department of Chemistry, College of Science, Qassim University, Buraydah 51452, Saudi Arabia

2 Laboratory of Catalysis, Bioprocess and Environment, Department of Process Engineering, Faculty of Technology, University of 20 August 1955, Skikda 21000, Algeria

* **Correspondence: Seyfeddine Rahali (**S.Rahali@qu.edu.sa**)**

**Table S1.** Cartesian coordinates (in Å) of all optimized systems considered in this work, calculated at the M06-2X/def2-TZVP level of theory.

| **PCP**  C 0.842942 -0.186711 1.790651  C -0.366806 -0.850831 1.667811  C 1.910374 -0.477301 0.950611  H 0.934231 0.626032 2.502982  C -0.554102 -1.824422 0.692823  H -1.195942 -0.548308 2.295960  C 1.772933 -1.554028 0.078736  C 3.102461 0.441147 0.881752  C 0.558933 -2.213541 -0.049391  C -1.928206 -2.395995 0.412607  H 2.603188 -1.832020 -0.562220  C 3.077908 1.375150 -0.342844  H 3.150038 1.045767 1.791311  H 4.024975 -0.143622 0.838870  H 0.454298 -2.999445 -0.789368  C -3.077915 -1.375095 0.342849  H -1.890141 -2.955701 -0.526433  H -2.179116 -3.123704 1.190494  C 1.928168 2.396024 -0.412474  H 4.016881 1.934049 -0.352692  H 3.081520 0.764369 -1.248991  C -3.102417 -0.441206 -0.881831  H -4.016901 -1.933974 0.352743  H -3.081536 -0.764239 1.248946  C 0.554090 1.824438 -0.692801  H 1.890053 2.955581 0.526653  H 2.179053 3.123861 -1.190249  C -1.910350 0.477269 -0.950676  H -3.149889 -1.045912 -1.791340  H -4.024958 0.143530 -0.839082  C 0.366859 0.850825 -1.667773  C -0.558999 2.213574 0.049330  C -0.842875 0.186680 -1.790656  C -1.772979 1.554038 -0.078836  H 1.196026 0.548278 -2.295870  H -0.454418 2.999499 0.789292  H -0.934109 -0.626090 -2.502963  H -2.603270 1.832036 0.562068 | **Li-PCP**  C 0.79960000 -0.22290000 1.94020000  C -0.38630000 -1.03090000 1.92830000  C 1.79680000 -0.38210000 1.00580000  H 0.90140000 0.55330000 2.69030000  C -0.62860000 -1.84430000 0.77040000  H -1.18000000 -0.83920000 2.63560000  C 1.68170000 -1.43730000 0.03870000  C 2.98140000 0.54740000 0.95190000  C 0.39890000 -2.06090000 -0.11880000  C -2.00580000 -2.40830000 0.53550000  H 2.44710000 -1.57560000 -0.71080000  C 3.08830000 1.36670000 -0.34550000  H 2.94620000 1.22790000 1.80700000  H 3.90350000 -0.03780000 1.04490000  H 0.22510000 -2.70100000 -0.97660000  C -3.10120000 -1.34750000 0.33440000  H -1.98210000 -3.07200000 -0.33320000  H -2.29700000 -3.01870000 1.39800000  C 1.99160000 2.42010000 -0.56700000  H 4.05440000 1.87760000 -0.33970000  H 3.10620000 0.68340000 -1.19840000  C -2.99800000 -0.51210000 -0.95120000  H -4.06640000 -1.85990000 0.33070000  H -3.11120000 -0.67750000 1.19780000  C 0.61980000 1.83350000 -0.79290000  H 1.95930000 3.09230000 0.29490000  H 2.27920000 3.02830000 -1.42980000  C -1.80030000 0.40530000 -0.98710000  H -2.96420000 -1.18320000 -1.81400000  H -3.91600000 0.07550000 -1.04520000  C 0.38770000 0.96270000 -1.85440000  C -0.42420000 2.07170000 0.09340000  C -0.80360000 0.25690000 -1.94470000  C -1.61950000 1.37350000 -0.00280000  H 1.16960000 0.78610000 -2.58480000  H -0.27660000 2.77010000 0.90990000  H -0.93650000 -0.46950000 -2.73900000  H -2.39580000 1.53970000 0.73580000  Li 1.23730000 -2.36700000 1.87360000 | **Sc-PCP**  C 0.82460000 -0.25130000 1.93870000  C -0.37650000 -0.93970000 1.86410000  C 1.80860000 -0.42050000 0.97060000  H 0.97850000 0.47310000 2.73090000  C -0.63020000 -1.82270000 0.81890000  H -1.14780000 -0.74900000 2.60260000  C 1.59800000 -1.38540000 -0.00980000  C 3.02300000 0.47220000 0.91810000  C 0.39790000 -2.07590000 -0.08270000  C -2.00770000 -2.40520000 0.62550000  H 2.36270000 -1.56370000 -0.75820000  C 3.08530000 1.34640000 -0.34380000  H 3.03940000 1.11480000 1.80230000  H 3.93080000 -0.13650000 0.95410000  H 0.23500000 -2.78330000 -0.88830000  C -3.08640000 -1.34700000 0.34710000  H -1.98580000 -3.12280000 -0.19890000  H -2.30220000 -2.96150000 1.51980000  C 1.98360000 2.40970000 -0.47100000  H 4.04940000 1.86000000 -0.35530000  H 3.06830000 0.70340000 -1.22750000  C -2.94630000 -0.58610000 -0.98050000  H -4.05910000 -1.84430000 0.34700000  H -3.10680000 -0.63000000 1.17190000  C 0.60710000 1.85910000 -0.73610000  H 1.96060000 3.02180000 0.43440000  H 2.25420000 3.07500000 -1.29870000  C -1.78220000 0.36760000 -1.03670000  H -2.87010000 -1.30020000 -1.80460000  H -3.86850000 -0.01520000 -1.13750000  C 0.34720000 1.16630000 -1.98600000  C -0.43510000 2.06250000 0.12430000  C -0.77730000 0.23500000 -1.95350000  C -1.76190000 1.51750000 -0.14960000  H 1.16900000 0.96320000 -2.65650000  H -0.28000000 2.64610000 1.02350000  H -0.81600000 -0.57070000 -2.67640000  H -2.52730000 1.61340000 0.60620000  Sc -1.36400000 2.59880000 -2.06300000 |
| --- | --- | --- |
| **1H2/PCP**  C 0.87610000 -0.17320000 1.73530000  C -0.33020000 -0.84550000 1.62170000  C 1.93360000 -0.44470000 0.87620000  H 0.97210000 0.62960000 2.45810000  C -0.52410000 -1.80840000 0.63720000  H -1.15140000 -0.55950000 2.26750000  C 1.79190000 -1.51210000 -0.00680000  C 3.11770000 0.48320000 0.80230000  C 0.58110000 -2.17970000 -0.12570000  C -1.89710000 -2.38890000 0.37160000  H 2.61560000 -1.77720000 -0.66140000  C 3.06680000 1.43360000 -0.40880000  H 3.17490000 1.07530000 1.71950000  H 4.04340000 -0.09430000 0.73700000  H 0.47290000 -2.95900000 -0.87200000  C -3.05610000 -1.37710000 0.33220000  H -1.86880000 -2.93700000 -0.57460000  H -2.12870000 -3.12790000 1.14480000  C 1.90780000 2.44560000 -0.44710000  H 4.00100000 2.00020000 -0.42500000  H 3.06170000 0.83530000 -1.32330000  C -3.10620000 -0.42710000 -0.87940000  H -3.99020000 -1.94400000 0.34810000  H -3.05170000 -0.77840000 1.24640000  C 0.53440000 1.86640000 -0.71440000  H 1.87940000 2.99210000 0.50010000  H 2.14090000 3.18600000 -1.21850000  C -1.92270000 0.50210000 -0.95350000  H -3.16240000 -1.01990000 -1.79620000  H -4.03260000 0.14940000 -0.81500000  C 0.34000000 0.90510000 -1.70020000  C -0.57030000 2.23550000 0.05020000  C -0.86600000 0.23250000 -1.81390000  C -1.78070000 1.56760000 -0.06870000  H 1.16160000 0.61870000 -2.34550000  H -0.46090000 3.01180000 0.79960000  H -0.96160000 -0.57060000 -2.53640000  H -2.60310000 1.82970000 0.58880000  H 1.71190000 -3.45290000 3.09730000  H 1.55870000 -2.96230000 2.56220000 | **1H2/Li-PCP**  C 0.77480000 -0.16750000 1.95900000  C -0.41870000 -0.87170000 1.88390000  C 1.78480000 -0.36510000 1.02470000  H 0.89870000 0.59530000 2.71990000  C -0.63980000 -1.79050000 0.86160000  H -1.21070000 -0.65660000 2.59280000  C 1.61380000 -1.37880000 0.08550000  C 2.98570000 0.54670000 0.96030000  C 0.41680000 -2.07530000 0.00390000  C -2.01070000 -2.38210000 0.64190000  H 2.40020000 -1.58360000 -0.63260000  C 3.11380000 1.31220000 -0.36620000  H 2.93900000 1.26260000 1.78570000  H 3.90050000 -0.03650000 1.10110000  H 0.27830000 -2.81110000 -0.78060000  C -3.09980000 -1.33810000 0.34860000  H -1.96640000 -3.09740000 -0.18410000  H -2.31530000 -2.94470000 1.52940000  C 2.02360000 2.36100000 -0.64550000  H 4.07950000 1.82390000 -0.37180000  H 3.13930000 0.59720000 -1.19240000  C -2.97150000 -0.58780000 -0.98810000  H -4.06760000 -1.84570000 0.35540000  H -3.12800000 -0.61130000 1.16450000  C 0.64930000 1.78530000 -0.87160000  H 1.98580000 3.07250000 0.18430000  H 2.32960000 2.92190000 -1.53630000  C -1.78090000 0.33070000 -1.07260000  H -2.92900000 -1.31140000 -1.80660000  H -3.88820000 -0.00250000 -1.12400000  C 0.41920000 0.92150000 -1.98750000  C -0.39140000 2.05150000 -0.00700000  C -0.77300000 0.12150000 -1.98220000  C -1.67200000 1.42990000 -0.15470000  H 1.22120000 0.69380000 -2.67470000  H -0.22500000 2.73190000 0.82090000  H -0.86850000 -0.68650000 -2.69880000  H -2.44850000 1.60950000 0.57440000  Li -1.17140000 2.31500000 -2.01150000  H -0.45470000 4.25770000 -1.82610000  H -0.82420000 4.38190000 -2.46420000 | **1H2/Sc-PCP**  C 0.71720000 -0.13480000 1.97000000  C -0.48310000 -0.81350000 1.82470000  C 1.78860000 -0.38340000 1.11920000  H 0.80520000 0.64290000 2.72060000  C -0.64990000 -1.76250000 0.82080000  H -1.31820000 -0.56230000 2.46940000  C 1.65800000 -1.41260000 0.19170000  C 3.01290000 0.49700000 1.12090000  C 0.45720000 -2.09010000 0.04500000  C -2.01050000 -2.35010000 0.53740000  H 2.48920000 -1.65120000 -0.46330000  C 3.18340000 1.30240000 -0.17660000  H 2.96410000 1.18520000 1.96870000  H 3.90930000 -0.11360000 1.26080000  H 0.36070000 -2.84870000 -0.72380000  C -3.07420000 -1.30530000 0.16860000  H -1.92700000 -3.08070000 -0.27170000  H -2.36500000 -2.89590000 1.41640000  C 2.09350000 2.34770000 -0.45850000  H 4.14340000 1.82190000 -0.13310000  H 3.24490000 0.61100000 -1.02090000  C -2.86710000 -0.57820000 -1.16990000  H -4.04410000 -1.80660000 0.12790000  H -3.14450000 -0.56400000 0.96860000  C 0.74110000 1.77220000 -0.78870000  H 1.99990000 3.02060000 0.39780000  H 2.42700000 2.95820000 -1.30670000  C -1.67760000 0.34470000 -1.19440000  H -2.77480000 -1.31180000 -1.97530000  H -3.77250000 0.00500000 -1.36930000  C 0.58470000 0.96360000 -1.96590000  C -0.38510000 2.11980000 -0.07740000  C -0.61000000 0.12580000 -2.03440000  C -1.68770000 1.53270000 -0.38540000  H 1.45040000 0.68440000 -2.54770000  H -0.30330000 2.80630000 0.75570000  H -0.62340000 -0.72090000 -2.70870000  H -2.51000000 1.70910000 0.29240000  Sc -1.01230000 2.48250000 -2.34270000  H -2.87270000 1.73240000 -3.16050000  H -3.12140000 2.10910000 -2.53830000 |
| **2Li-PCP**  C 0.766475 -0.143496 1.876403  C -0.446119 -0.901293 1.839883  C 1.765918 -0.316681 0.943762  H 0.901236 0.600735 2.653256  C -0.669086 -1.772379 0.722560  H -1.220120 -0.739241 2.575227  C 1.615958 -1.326883 -0.063387  C 2.995486 0.550887 0.939707  C 0.352798 -1.987989 -0.176385  C -2.021838 -2.405853 0.540578  H 2.396965 -1.502246 -0.788161  C 3.142519 1.389064 -0.337037  H 2.971054 1.215931 1.807449  H 3.889219 -0.077514 1.034354  H 0.186188 -2.672169 -1.000826  C -3.148054 -1.384097 0.336012  H -1.990294 -3.084778 -0.316118  H -2.268602 -3.006103 1.424511  C 2.016250 2.410764 -0.541535  H 4.096374 1.920818 -0.299907  H 3.187178 0.723495 -1.202297  C -3.001073 -0.545934 -0.940762  H -4.101939 -1.915808 0.298966  H -3.192690 -0.718484 1.201237  C 0.663532 1.777217 -0.723510  H 1.984667 3.089597 0.315242  H 2.262920 3.011182 -1.425380  C -1.771500 0.321620 -0.944823  H -2.976678 -1.210998 -1.808489  H -3.894844 0.082422 -1.035338  C 0.440590 0.906140 -1.840835  C -0.358375 1.992852 0.175418  C -0.772045 0.148426 -1.877429  C -1.621536 1.331779 0.062394  H 1.214765 0.743802 -2.575929  H -0.191856 2.677219 0.999722  H -0.906825 -0.595762 -2.654319  H -2.402548 1.507122 0.787165  Li 1.187901 -2.268961 1.799598  Li -1.193725 2.274138 -1.800190 | **2Sc-PCP**  C 0.841634 -0.252779 1.983852  C -0.389006 -1.062658 1.933478  C 1.771137 -0.336323 0.953224  H 0.932721 0.521584 2.732529  C -0.659776 -1.784772 0.739861  H -1.189798 -0.837180 2.622532  C 1.702105 -1.441546 0.062584  C 2.989149 0.549146 0.937952  C 0.403640 -2.122704 -0.089524  C -2.019578 -2.400949 0.543222  H 2.445806 -1.559364 -0.711876  C 3.128662 1.371638 -0.346717  H 2.959970 1.220016 1.800276  H 3.883285 -0.075356 1.048174  H 0.238455 -2.756709 -0.949308  C -3.133138 -1.367655 0.345900  H -1.991021 -3.076383 -0.315547  H -2.263492 -3.009879 1.421440  C 2.015144 2.404914 -0.544428  H 4.088781 1.892562 -0.325467  H 3.155317 0.698823 -1.207262  C -2.993718 -0.545098 -0.938726  H -4.093274 -1.888536 0.324777  H -3.159483 -0.694836 1.206449  C 0.655350 1.788718 -0.740962  H 1.986604 3.080568 0.314173  H 2.259222 3.013627 -1.422730  C -1.775599 0.340265 -0.954006  H -2.964671 -1.215866 -1.801126  H -3.887784 0.079531 -1.048855  C 0.384592 1.066431 -1.934408  C -0.408088 2.126858 0.088389  C -0.846296 0.256845 -1.984937  C -1.706363 1.445250 -0.063292  H 1.185386 0.840816 -2.623395  H -0.242907 2.761081 0.948014  H -0.937478 -0.517441 -2.733657  H -2.450156 1.563375 0.711040  Sc -1.323274 2.518846 -1.996056  Sc 1.318694 -2.515112 1.994980 | **2H2/2Li-PCP**  C 0.753196 -0.054511 1.883269  C -0.476935 -0.793129 1.845876  C 1.764047 -0.282547 0.977496  H 0.883084 0.720725 2.629603  C -0.682025 -1.722249 0.781627  H -1.259035 -0.598512 2.564828  C 1.612311 -1.321262 0.001836  C 2.998859 0.577498 0.947600  C 0.352015 -1.989997 -0.092328  C -2.032865 -2.364812 0.609799  H 2.408449 -1.543151 -0.693242  C 3.162195 1.355069 -0.365873  H 2.968397 1.281471 1.783779  H 3.888754 -0.049007 1.079344  H 0.191498 -2.712138 -0.885126  C -3.157567 -1.356987 0.335384  H -1.986208 -3.086276 -0.211066  H -2.294136 -2.919490 1.519274  C 2.037493 2.362889 -0.640355  H 4.113201 1.892456 -0.337571  H 3.224375 0.649602 -1.197581  C -2.994362 -0.579251 -0.978012  H -4.108611 -1.894304 0.307039  H -3.219688 -0.651611 1.167168  C 0.686640 1.720276 -0.811979  H 1.990966 3.084438 0.180444  H 2.298622 2.917447 -1.549945  C -1.759531 0.280783 -1.007881  H -2.963974 -1.283037 -1.814340  H -3.884282 0.047264 -1.109521  C 0.481612 0.791000 -1.876108  C -0.347440 1.988244 0.061913  C -0.748578 0.052517 -1.913579  C -1.607681 1.319366 -0.032132  H 1.263730 0.596167 -2.594991  H -0.186829 2.710406 0.854665  H -0.878545 -0.722724 -2.659885  H -2.403973 1.541375 0.662728  Li 1.139231 -2.196808 1.902743  Li -1.134466 2.194467 -1.933056  H -0.443477 4.151582 -1.815134  H -0.810591 4.269084 -2.455390  H 0.817143 -4.274199 2.413455  H 0.448555 -4.154092 1.774550 |
| **2H2/2Sc-PCP**  C 0.738005 -0.114121 2.011687  C -0.515155 -0.837624 1.847400  C 1.770117 -0.298185 1.075660  H 0.793546 0.700155 2.720105  C -0.690147 -1.673712 0.716075  H -1.366159 -0.556716 2.452135  C 1.728204 -1.434599 0.232464  C 3.010105 0.553652 1.108900  C 0.455204 -2.111362 0.029043  C -2.025069 -2.321296 0.462672  H 2.546910 -1.634540 -0.444210  C 3.227224 1.340056 -0.188892  H 2.952369 1.246393 1.953056  H 3.888803 -0.080004 1.272416  H 0.361355 -2.832822 -0.770886  C -3.145724 -1.325114 0.150311  H -1.928330 -3.030943 -0.363464  H -2.322292 -2.902253 1.345761  C 2.106602 2.336178 -0.501467  H 4.174701 1.881148 -0.122000  H 3.326206 0.636723 -1.019682  C -2.928676 -0.538669 -1.147457  H -4.093200 -1.866215 0.083466  H -3.244648 -0.621917 0.981223  C 0.771655 1.688612 -0.754864  H 2.009804 3.046030 0.324495  H 2.403876 2.916921 -1.384706  C -1.688621 0.313130 -1.114334  H -2.870981 -1.231458 -1.991579  H -3.807329 0.095085 -1.310886  C 0.596676 0.852342 -1.886025  C -0.373753 2.126507 -0.068064  C -0.656469 0.128801 -2.050215  C -1.646781 1.449783 -0.271444  H 1.447719 0.571217 -2.490637  H -0.279956 2.848180 0.731707  H -0.711965 -0.685624 -2.758484  H -2.465487 1.649830 0.405230  Sc -0.991468 2.413934 -2.254815  Sc 1.073072 -2.399229 2.215803  H -2.730462 1.634992 -3.117356  H -3.029965 2.055686 -2.529050  H 3.111547 -2.040775 2.490381  H 2.811757 -1.619985 3.078406 | **4H2/2Li-PCP**  C 0.685404 -0.018608 1.903094  C -0.539356 -0.760744 1.839571  C 1.725780 -0.263950 1.032959  H 0.788596 0.776220 2.633104  C -0.702511 -1.724307 0.799752  H -1.345266 -0.553765 2.528305  C 1.609985 -1.319948 0.080318  C 2.960679 0.597706 1.033354  C 0.358137 -2.009005 -0.032981  C -2.047334 -2.370370 0.596898  H 2.430177 -1.554924 -0.582002  C 3.176687 1.351184 -0.287133  H 2.896594 1.317547 1.854384  H 3.844816 -0.025906 1.212226  H 0.229091 -2.753368 -0.810536  C -3.158400 -1.366461 0.256652  H -1.972836 -3.112538 -0.203125  H -2.342560 -2.900964 1.510047  C 2.065641 2.355088 -0.627626  H 4.125991 1.889184 -0.229377  H 3.273116 0.630198 -1.101897  C -2.942623 -0.612844 -1.063798  H -4.107733 -1.904415 0.198923  H -3.254754 -0.645519 1.071466  C 0.720794 1.709037 -0.830487  H 1.991092 3.097289 0.172355  H 2.361003 2.885534 -1.540797  C -1.707768 0.248878 -1.063635  H -2.878708 -1.332613 -1.884903  H -3.826836 0.010697 -1.242460  C 0.557636 0.745177 -1.870033  C -0.339893 1.993831 0.002192  C -0.667312 0.003336 -1.933714  C -1.591754 1.304879 -0.111044  H 1.363633 0.537844 -2.558559  H -0.210837 2.738369 0.779578  H -0.770324 -0.791922 -2.663272  H -2.411937 1.540053 0.551225  Li 1.102126 -2.147844 2.004536  Li -1.083865 2.132285 -2.034866  H -0.342619 4.131197 -1.882260  H -0.680791 4.270093 -2.533763  H 0.682259 -4.286232 2.508519  H 0.353647 -4.147380 1.852209  H 2.654838 -2.266982 3.585085  H 2.550476 -1.540605 3.445500  H -2.528186 1.532280 -3.483905  H -2.628139 2.258842 -3.625884 | **4H2/2Sc-PCP**  C 0.709614 -0.133387 1.996549  C -0.526688 -0.869917 1.844720  C 1.734299 -0.290662 1.034304  H 0.769920 0.666615 2.721015  C -0.712659 -1.721107 0.729985  H -1.366315 -0.627808 2.482222  C 1.667954 -1.396038 0.154071  C 2.976695 0.557509 1.081383  C 0.424245 -2.117457 -0.011981  C -2.057785 -2.348685 0.482702  H 2.485266 -1.590494 -0.527245  C 3.237583 1.335057 -0.212395  H 2.904825 1.255365 1.920873  H 3.852995 -0.074522 1.266147  H 0.316547 -2.816492 -0.829463  C -3.148533 -1.332741 0.129453  H -1.969740 -3.087097 -0.319709  H -2.389070 -2.888004 1.377607  C 2.146952 2.351109 -0.565649  H 4.195540 1.856036 -0.127074  H 3.341018 0.625272 -1.037437  C -2.887627 -0.554938 -1.164148  H -4.106402 -1.853854 0.044005  H -3.252112 -0.623079 0.954590  C 0.801769 1.723507 -0.812701  H 2.059038 3.089544 0.236754  H 2.477942 2.890346 -1.460717  C -1.644963 0.292853 -1.116912  H -2.816120 -1.252550 -2.003882  H -3.763732 0.077425 -1.348729  C 0.615880 0.871980 -1.926983  C -0.335180 2.119973 -0.070537  C -0.620401 0.135609 -2.079508  C -1.578430 1.397815 -0.236345  H 1.455543 0.630511 -2.564709  H -0.227193 2.818194 0.747593  H -0.680245 -0.664996 -2.803319  H -2.396058 1.592269 0.444614  Sc -1.071560 2.394252 -2.241848  Sc 1.160389 -2.392093 2.159439  H -2.763650 1.475918 -3.126273  H -3.136110 1.983045 -2.679383  H 3.225511 -1.981629 2.590972  H 2.854975 -1.476600 3.041815  H -0.470806 -3.735891 2.585591  H -0.219739 -3.989695 1.902505  H 0.306841 3.991264 -1.979447  H 0.556082 3.743836 -2.665637 |
|  |  |  |
| **6H2/2Li-PCP**  C 0.652639 -0.054854 1.923095  C -0.557806 -0.812490 1.786298  C 1.726577 -0.256005 1.081395  H 0.714134 0.722633 2.675774  C -0.652334 -1.772991 0.740608  H -1.392403 -0.642333 2.451537  C 1.665223 -1.280350 0.093947  C 2.944090 0.627586 1.152331  C 0.443445 -2.018394 -0.061694  C -1.974491 -2.443082 0.473215  H 2.517001 -1.485598 -0.538496  C 3.210627 1.403950 -0.145447  H 2.828000 1.333970 1.979358  H 3.829954 0.016460 1.365068  H 0.360452 -2.754817 -0.852273  C -3.085876 -1.454630 0.089192  H -1.850323 -3.178868 -0.325990  H -2.302514 -2.985483 1.367791  C 2.096952 2.389012 -0.529895  H 4.143832 1.960966 -0.031585  H 3.364366 0.696926 -0.963510  C -2.824517 -0.677361 -1.209587  H -4.019847 -2.010767 -0.022990  H -3.237444 -0.747784 0.907795  C 0.776298 1.715812 -0.796993  H 1.971416 3.123194 0.271014  H 2.423022 2.932725 -1.424467  C -1.607473 0.206736 -1.143522  H -2.712592 -1.382145 -2.038339  H -3.711107 -0.066117 -1.417245  C 0.682717 0.752603 -1.841025  C -0.319806 1.963101 0.002312  C -0.533052 0.001951 -1.984409  C -1.547820 1.237732 -0.163598  H 1.517219 0.580565 -2.506090  H -0.238961 2.702617 0.790580  H -0.593567 -0.779933 -2.732435  H -2.398723 1.443166 0.469521  Li 1.112834 -2.196552 1.970253  Li -1.012433 2.095812 -2.065266  H -0.424605 4.147994 -1.903329  H -0.782307 4.267425 -2.547024  H 0.231026 -3.846643 3.297790  H -0.236589 -3.264910 3.317208  H 2.887881 -2.287373 3.527866  H 2.705125 -1.574506 3.411015  H -2.923384 1.886582 -3.239464  H -3.139914 2.387705 -2.730413  H 2.570144 -3.846376 1.285507  H 2.153345 -4.370726 1.613021  H -0.170086 2.017059 -4.361203  H -0.786770 2.216890 -4.727327 | **6H2/2Sc-PCP**  C 0.646998 -0.004186 1.963299  C -0.572346 -0.712846 1.824505  C 1.705020 -0.253067 1.048471  H 0.720941 0.823046 2.655084  C -0.763576 -1.656817 0.772259  H -1.399541 -0.482590 2.483998  C 1.596008 -1.368755 0.162383  C 2.979537 0.542324 1.091129  C 0.369361 -2.065841 0.021027  C -2.112192 -2.291767 0.565977  H 2.427915 -1.620551 -0.482400  C 3.291365 1.256154 -0.231688  H 2.915885 1.278566 1.897769  H 3.830749 -0.110467 1.322445  H 0.257302 -2.802880 -0.762851  C -3.185333 -1.280940 0.141056  H -2.027709 -3.073663 -0.194681  H -2.455564 -2.779738 1.485639  C 2.218263 2.266917 -0.656861  H 4.257022 1.763252 -0.150500  H 3.400747 0.506449 -1.020821  C -2.873658 -0.566882 -1.181679  H -4.150972 -1.788074 0.059869  H -3.294668 -0.531340 0.930299  C 0.869642 1.632008 -0.862956  H 2.133862 3.049085 0.103526  H 2.561668 2.754615 -1.576660  C -1.599100 0.228424 -1.139161  H -2.810267 -1.302946 -1.988514  H -3.724941 0.085921 -1.412741  C 0.678282 0.687990 -1.915087  C -0.263307 2.041112 -0.111710  C -0.541076 -0.020624 -2.053922  C -1.489883 1.343981 -0.252888  H 1.505335 0.457768 -2.574784  H -0.151301 2.778258 0.672069  H -0.615291 -0.847668 -2.745904  H -2.321861 1.595717 0.391837  Sc -0.979300 2.278587 -2.338912  Sc 1.085158 -2.303358 2.248290  H -2.688801 1.542616 -3.274855  H -3.042789 2.116198 -2.867528  H 3.148359 -2.139305 2.777495  H 2.793950 -1.565433 3.184052  H 0.075377 -4.161661 2.434603  H 0.246832 -4.099824 1.668397  H -0.139974 4.074633 -1.759745  H 0.031980 4.135762 -2.525941  H -0.448391 2.278730 -4.355111  H -0.903688 1.618624 -4.259786  H 1.008396 -1.641227 4.168264  H 0.553157 -2.301148 4.264272 | **8H2/2Li-PCP**  C 0.690525 -0.189124 1.914003  C -0.500537 -0.974048 1.745023  C 1.746677 -0.288433 1.032866  H 0.746478 0.531387 2.721800  C -0.591894 -1.851164 0.630011  H -1.327848 -0.875874 2.434185  C 1.692834 -1.235079 -0.027981  C 2.934335 0.631344 1.140088  C 0.489845 -1.997027 -0.214674  C -1.896152 -2.548161 0.343138  H 2.532611 -1.359493 -0.696599  C 3.138141 1.509849 -0.102980  H 2.815853 1.269892 2.020091  H 3.845986 0.039103 1.285493  H 0.410435 -2.674333 -1.056709  C -3.051935 -1.578630 0.055532  H -1.764912 -3.218957 -0.510292  H -2.181513 -3.165797 1.202889  C 1.981560 2.478221 -0.391193  H 4.052346 2.093184 0.031489  H 3.299063 0.870771 -0.973849  C -2.848188 -0.701974 -1.188936  H -3.967219 -2.160699 -0.077040  H -3.210514 -0.938187 0.925849  C 0.677680 1.780435 -0.678485  H 1.849371 3.149465 0.461737  H 2.267092 3.095719 -1.250968  C -1.660756 0.218257 -1.082570  H -2.729051 -1.342260 -2.067652  H -3.759925 -0.110285 -1.335962  C 0.591772 0.893132 -1.786103  C -0.407425 1.931323 0.161497  C -0.600442 0.111791 -1.957839  C -1.611236 1.172500 -0.028180  H 1.420344 0.793715 -2.473709  H -0.330268 2.611943 1.001105  H -0.654005 -0.613455 -2.761592  H -2.451874 1.298280 0.639012  Li 1.223023 -2.307867 1.786894  Li -1.132419 2.243447 -1.838581  H 0.221943 3.396439 -3.142748  H -0.229996 3.987751 -3.080191  H 0.430789 -4.156150 2.861862  H -0.047512 -3.599610 2.999415  H 3.138765 -2.520556 3.019363  H 2.861730 -1.846748 3.178043  H -2.705324 1.640572 -3.329671  H -2.985371 2.331249 -3.320214  H 2.665931 -3.914581 0.757117  H 2.357520 -4.505740 1.089768  H -0.056298 1.222610 -4.679419  H -0.403671 1.282597 -5.332581  H 0.631246 -1.567421 5.195001  H 0.237263 -1.457832 4.575198  H -2.179643 4.316129 -1.408383  H -2.582163 3.788356 -1.067816 |
| **8H2/2Sc-PCP**  C 0.670346 -0.038893 1.933162  C -0.535466 -0.779712 1.815245  C 1.716306 -0.240059 1.017533  H 0.731559 0.779783 2.638133  C -0.699235 -1.686982 0.714366  H -1.377053 -0.547012 2.453169  C 1.655155 -1.362181 0.123695  C 2.971940 0.583496 1.077089  C 0.426707 -2.055841 -0.040074  C -2.030174 -2.352283 0.504452  H 2.488230 -1.576597 -0.531591  C 3.249600 1.338673 -0.228654  H 2.895974 1.298145 1.902140  H 3.836797 -0.058218 1.287889  H 0.315940 -2.771817 -0.843846  C -3.136183 -1.357701 0.130654  H -1.936933 -3.106479 -0.282727  H -2.340288 -2.877837 1.416499  C 2.143584 2.333138 -0.602707  H 4.200531 1.870571 -0.143227  H 3.369335 0.615747 -1.040481  C -2.858722 -0.602378 -1.175041  H -4.087166 -1.889525 0.045309  H -3.255785 -0.634823 0.942547  C 0.812677 1.667741 -0.812505  H 2.050315 3.087537 0.184266  H 2.453642 2.858488 -1.514884  C -1.603078 0.221157 -1.115638  H -2.782920 -1.316913 -2.000209  H -3.723624 0.039339 -1.385634  C 0.648756 0.760475 -1.913346  C -0.313265 2.036844 -0.058123  C -0.557159 0.019792 -2.031220  C -1.541803 1.343326 -0.221827  H 1.490261 0.527756 -2.551353  H -0.202481 2.752946 0.745526  H -0.618520 -0.798810 -2.736255  H -2.374800 1.557823 0.433516  Sc -1.061485 2.342632 -2.311055  Sc 1.174997 -2.361495 2.212975  H -2.675858 1.405179 -3.270400  H -3.073729 2.002185 -2.952209  H 3.186861 -2.021534 2.854950  H 2.789345 -1.423644 3.172039  H -0.282307 -3.859867 2.688051  H -0.102077 -4.012611 1.940494  H 0.213386 3.994126 -2.035495  H 0.394071 3.842990 -2.783398  H -0.827896 2.529436 -4.428067  H -1.017133 1.770728 -4.305610  H 1.130904 -1.788577 4.207568  H 0.942989 -2.547470 4.330757  H 2.346955 -4.135553 1.984129  H 1.808582 -4.166196 1.404922  H -1.696072 4.146023 -1.501174  H -2.234533 4.115932 -2.080325 | **10H2/2Sc-PCP**  C 0.718270 0.123834 1.914804  C -0.461973 -0.665721 1.874281  C 1.754383 -0.104616 0.995577  H 0.763416 0.990544 2.561113  C -0.612036 -1.653720 0.843060  H -1.298500 -0.420554 2.514055  C 1.715930 -1.283905 0.177645  C 2.977207 0.768167 0.965879  C 0.510727 -2.030248 0.089328  C -1.920000 -2.381851 0.709761  H 2.543672 -1.513466 -0.479144  C 3.189793 1.441279 -0.395959  H 2.893688 1.534206 1.742536  H 3.871958 0.175741 1.195066  H 0.411850 -2.804746 -0.659875  C -3.074613 -1.459572 0.298556  H -1.813264 -3.183226 -0.027409  H -2.188354 -2.856441 1.662110  C 2.035104 2.363743 -0.806698  H 4.119823 2.014851 -0.374413  H 3.318235 0.668940 -1.159496  C -2.861770 -0.786861 -1.063466  H -4.004651 -2.033132 0.276961  H -3.203230 -0.686980 1.061811  C 0.727184 1.635561 -0.940276  H 1.928345 3.164665 -0.069054  H 2.303439 2.838743 -1.758843  C -1.639035 0.086052 -1.093046  H -2.777818 -1.553171 -1.839801  H -3.756530 -0.194623 -1.293069  C 0.577350 0.647482 -1.971371  C -0.395825 2.011978 -0.186714  C -0.602793 -0.142059 -2.012330  C -1.600735 1.265273 -0.275140  H 1.413940 0.402632 -2.611190  H -0.297202 2.786369 0.562628  H -0.647677 -1.008691 -2.658756  H -2.428655 1.494709 0.381478  Sc -1.200956 2.136249 -2.439294  Sc 1.316249 -2.154576 2.341896  H -2.783250 1.084332 -3.338096  H -3.200020 1.688318 -3.057973  H 3.315995 -1.707442 2.960150  H 2.899809 -1.103139 3.240139  H -0.068481 -3.670517 2.941284  H 0.110960 -3.873109 2.204773  H 0.002876 3.855744 -2.301987  H 0.183643 3.652712 -3.038066  H -0.986488 2.196835 -4.566378  H -1.146613 1.440535 -4.395111  H 1.263297 -1.459868 4.297864  H 1.104747 -2.216745 4.468700  H 2.574512 -3.869235 2.199402  H 2.022002 -3.975569 1.641581  H -1.907628 3.956089 -1.737206  H -2.462169 3.848161 -2.292616  H 1.368404 -6.342452 3.947412  H 1.580115 -5.669721 4.174932  H -1.281394 6.317832 -4.051582  H -1.498499 5.648201 -4.283107 |  |

**Table S2.** Comparison of calculated binding energies for Li- and Sc-functionalized paracyclophane homologues reported in the literature and in the present work.

| **System** | **Eb (eV)** | | **Ref.** |
| --- | --- | --- | --- |
| **Li** | **Sc** |
| [1,1]PCP | -1.15 | unstable | [17] |
| [2,2]PCP | -1.19 | -2.70 | [18] |
| [3,3]PCP | -0.683 / -1.279 | -1.364 / -1.468 | This work |
| [4,4]PCP | -0.82 | -1.56 | [19] |
